# Supplementary material for: MRD-guided ibrutinib and venetoclax in patients with chronic lymphocytic leukemia and complex karyotype
Source: Research Square preprint supplement (doi:10.21203/rs.3.rs-8855521/v1), 2026-02-18
Supplement: Supplementary file 1 [file 3421ffabd72762e99238c856.xlsx]

## Sheet: Лист1
Adverse event	Grade 1–2, n (%)	Grade 3–5, n (%)	Total, n (%)
Hematologic
Anemia	12 (24%)	2 (4%)	14 (28%)
Neutropenia	4 (8%)	21 (42%)	25 (50%)
Thrombocytopenia	8 (16%)	5 (10%)	13 (26%)
Gastrointestinal
Constipation	1 (2%)	0 (0%)	1 (2%)
Decreased appetite	2 (4%)	1 (2%)	3 (6%)
Diarrhea	21 (42%)	3 (6%)	24 (48%)
Dyspepsia	16 (32%)	0 (0%)	16 (32%)
Gastroesophageal reflux disease	5 (10%)	0 (0%)	5 (10%)
Nausea	11 (22%)	0 (0%)	11 (22%)
Vomiting	8 (16%)	0 (0%)	8 (16%)
Infectious
Bronchitis	4 (8%)	0 (0%)	4 (8%)
COVID-19	5 (10%)	9 (18%)	14 (28%)
Conjunctivitis	2 (4%)	0 (0%)	2 (4%)
Pneumonia	2 (4%)	4 (8%)	6 (12%)
Sinusitis	2 (4%)	0 (0%)	2 (4%)
Skin infection	2 (4%)	0 (0%)	2 (4%)
Soft tissue infection	1 (2%)	5 (10%)	6 (12%)
Stomatitis	3 (6%)	0 (0%)	3 (6%)
Upper respiratory tract infection	21 (42%)	0 (0%)	21 (42%)
Urinary tract infection	7 (14%)	1 (2%)	8 (16%)
Cardiac/thrombotic/bleeding
Anal hemorrhage	4 (8%)	0 (0%)	4 (8%)
Atrial fibrillation	5 (10%)	2 (4%)	7 (14%)
Bruising	17 (34%)	1 (2%)	18 (36%)
Epistaxis	2 (4%)	1 (2%)	3 (6%)
Hypertension	8 (16%)	2 (4%)	10 (20%)
Superficial thrombophlebitis	1 (2%)	1 (2%)	2 (4%)
Other
Arthralgia	6 (12%)	0 (0%)	6 (12%)
Chills	4 (8%)	0 (0%)	4 (8%)
Cough	4 (8%)	0 (0%)	4 (8%)
Dizziness	9 (18%)	0 (0%)	9 (18%)
Dry skin	6 (12%)	1 (2%)	7 (14%)
Dyspnoe	2 (4%)	0 (0%)	2 (4%)
Fatigue	3 (6%)	0 (0%)	3 (6%)
Headache	4 (8%)	0 (0%)	4 (8%)
Itching	4 (8%)	1 (2%)	5 (10%)
Muscle spasms	11 (22%)	0 (0%)	11 (22%)
Oedema	10 (20%)	1 (2%)	11 (22%)
Pyrexia	2 (4%)	0 (0%)	2 (4%)
Rash	6 (12%)	1 (2%)	7 (14%)
