# Supplementary material for: MRD-guided ibrutinib and venetoclax in patients with chronic lymphocytic leukemia and complex karyotype
Source: Research Square preprint supplement (doi:10.21203/rs.3.rs-8855521/v1), 2026-02-18
Supplement: Supplementary file 2 [file ff0fc3def4e138b8deb3b9fa.xlsx]

## Sheet: Лист1
Variable	Ibrutinib	Ibrutinib + Venetoclax	p
Patients, total	56	50	–
Median age (range)	65 (34–84)	63 (37–80)	0.061
Male/female	34/22	27/23	0.485
Binet A	0	0	0.165
B	30	34
C	25	16
ECOG 0–1	40	36	0.948
2–4	16	14
Latent hepatitis B infection	7 (12.5%)	6 (12%)	0.938
Median CIRS (range)	4 (1–21)	4 (0 –13)	0.103
High-CK (≥5 aberrations)	46	43	0.282
CK (≥3 aberrations) + deletion 17p	10	5
Deletion 17p	39 (70%)	33 (66%)	0.688
Unmutated IGVH	49/49 (100%)	37/44 (84%)	0.056
Median previous therapy lines (range)	2 (0–7)	1 (0–5)	0.344
Richter transformation on treatment	4 (7%)	3 (6%)	0.709
